# Supplementary material for: High‐resolution analysis of individual spike peptide‐specific CD4 + T‐cell responses in vaccine recipients and COVID‐19 patients
Source: PubMed Central journal article supplement (PMC9363231; doi:10.1002/cti2.1410), 2022-08-09
Supplement: CTI2-11-e1410-s003.pdf [file CTI2-11-e1410-s003.pdf]

**Karsten, Cords *et al.***  
**Spike peptide-specific CD4<sup>+</sup> T cells**

**SUPPLEMENTARY**  
**FIGURES 1-14**

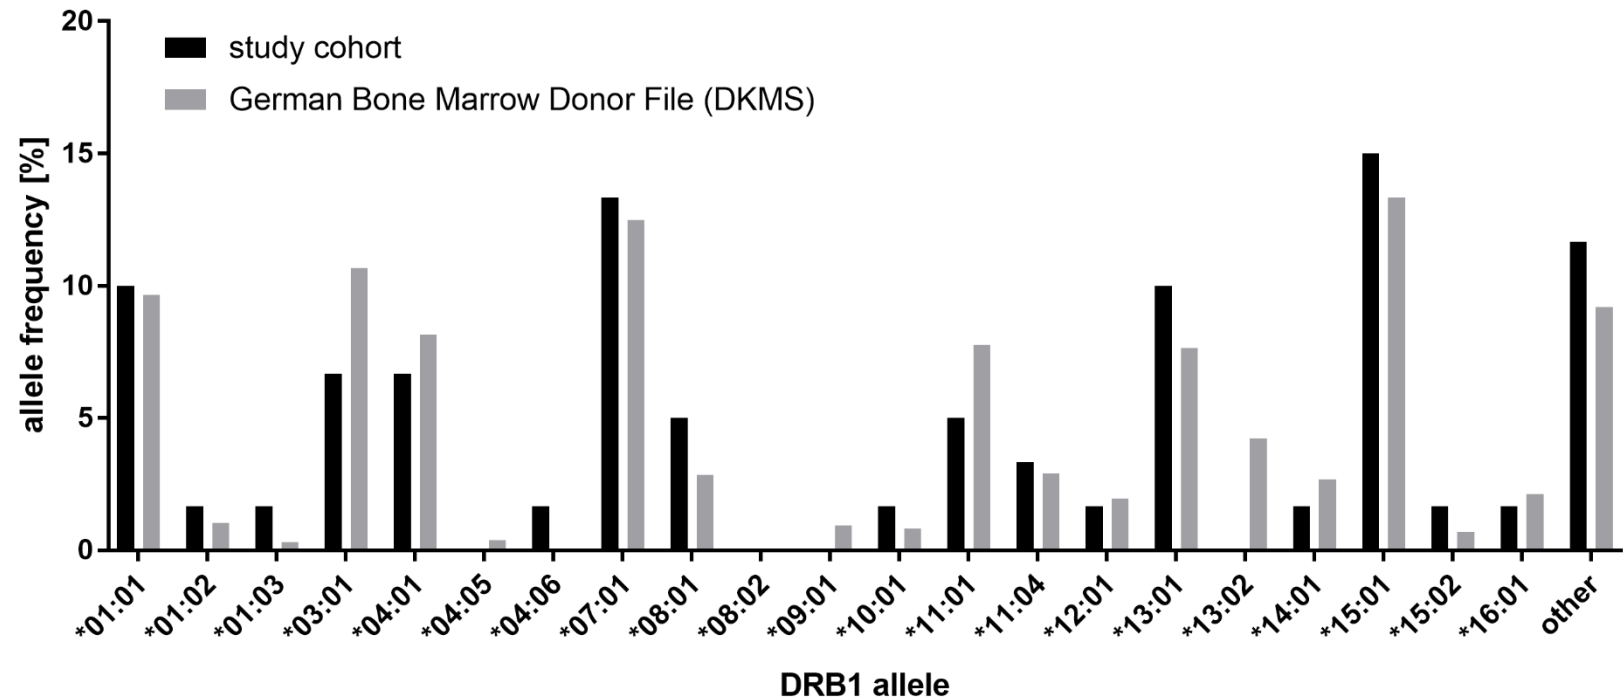

**Supplementary Figure 1. HLA-DRB1 allele frequencies** in the study cohort (black) and a representative German population (grey, German Bone Marrow Donor File, n=3456066). Allele frequency is defined as the total number of copies of the allele in the population sample (alleles / 2n).



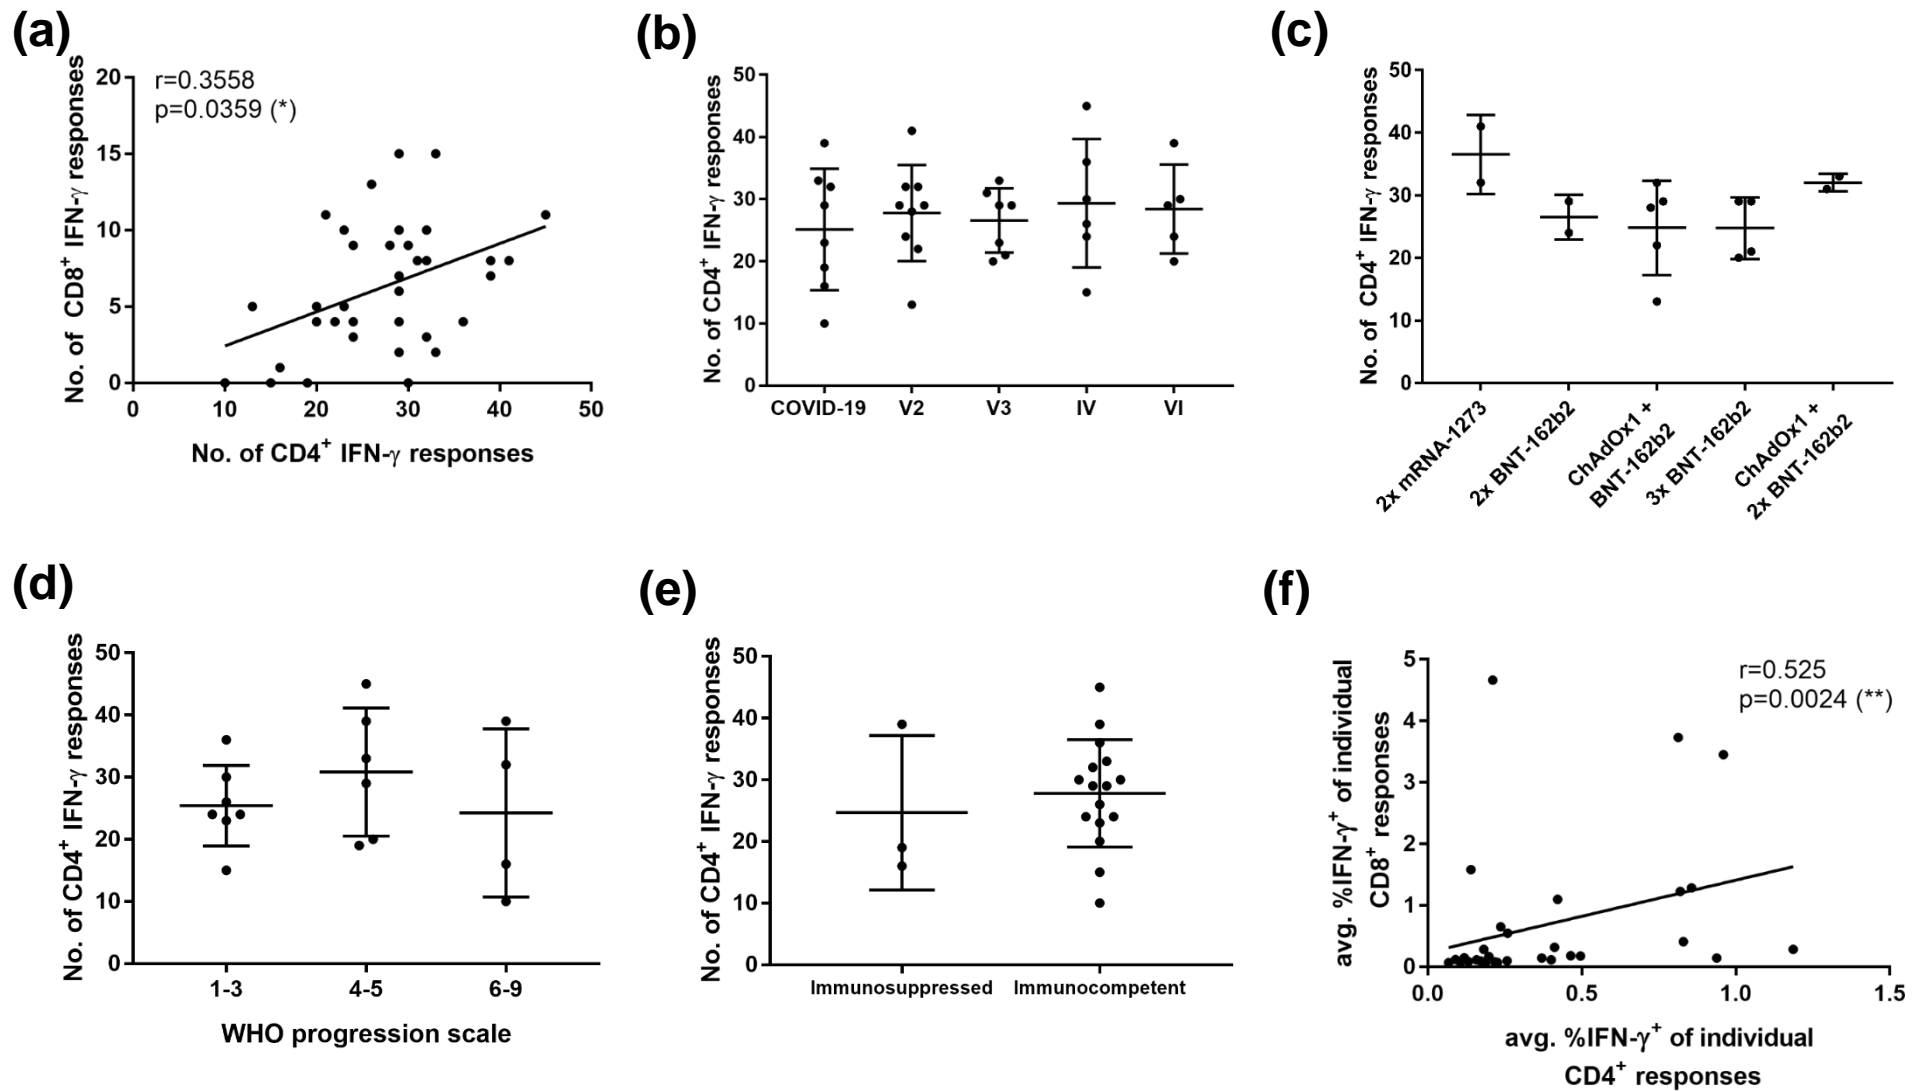

**Supplementary Figure 3. Sub-analysis of number and magnitude of CD4<sup>+</sup> and CD8<sup>+</sup> T-cell responses of the individual study participants**

The number **(a)** of the CD4<sup>+</sup> and CD8<sup>+</sup> T-cell responses for each individual correlate significantly. Each dot represents one study participant. More detailed subdividing of the study participants by study groups **(b)**, by vaccination regime **(c)**, disease severity **(d)** and state of immunocompetence **(e)** does not reveal significant differences in the number of CD4<sup>+</sup> T-cell responses. The average magnitude **(f)** of the CD4<sup>+</sup> and CD8<sup>+</sup> T-cell responses for each individual correlate significantly.

**(a)**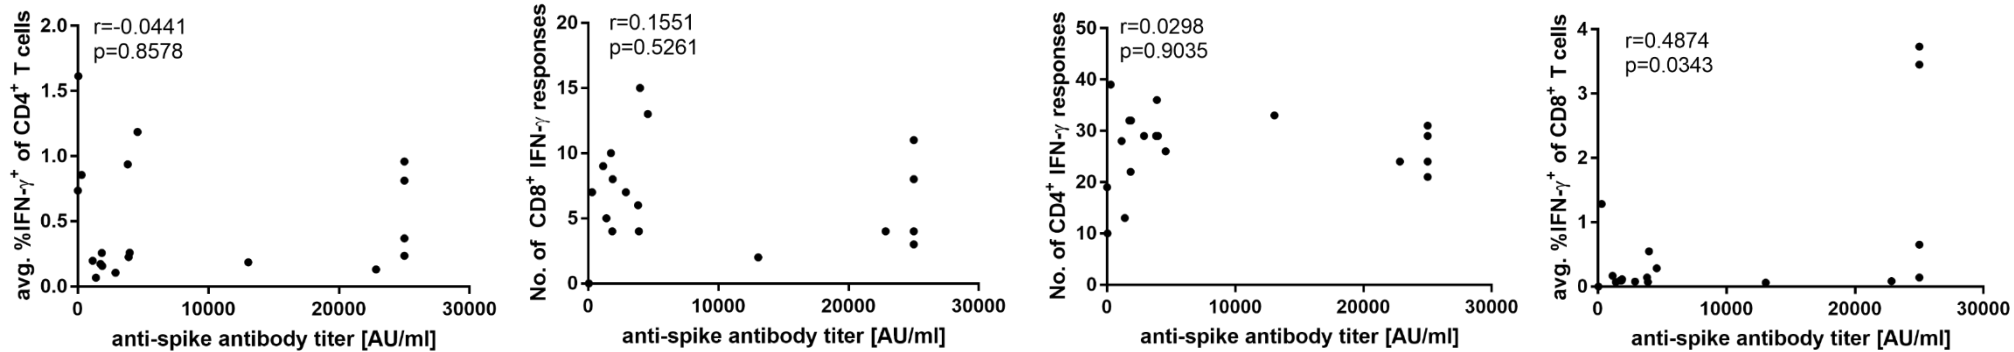**(b)**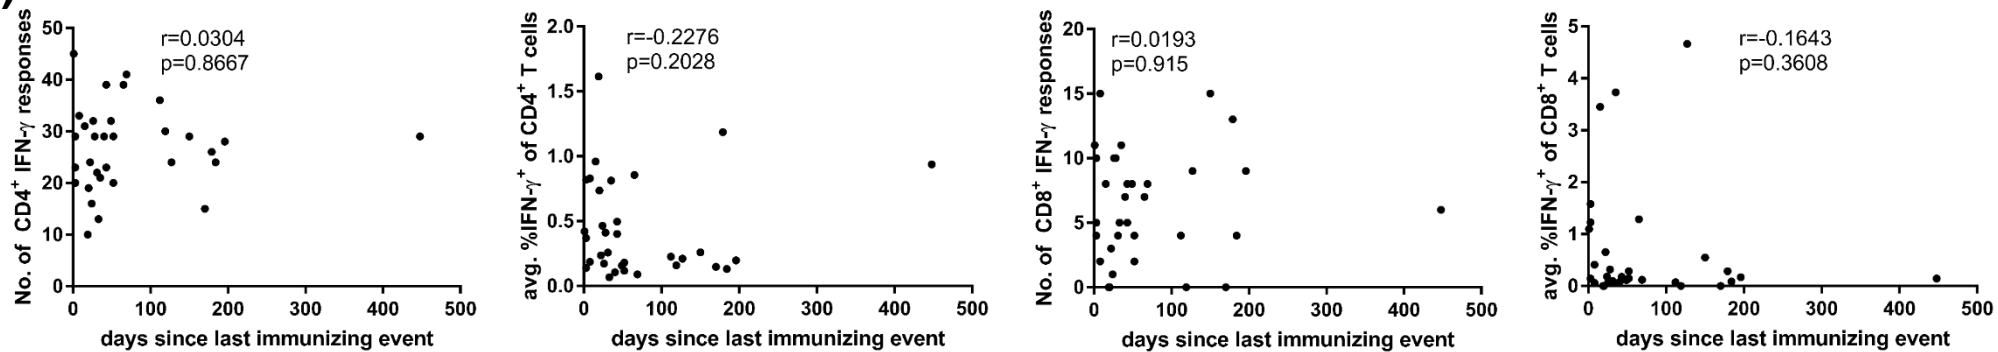**(c)**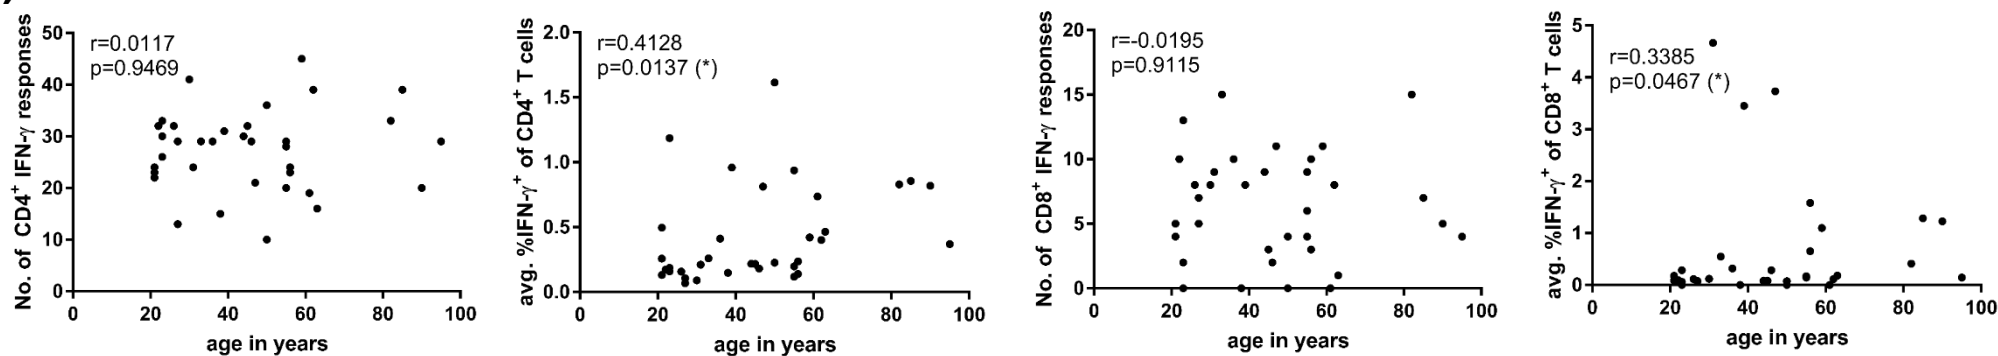

Supplementary Figure 4. Correlation analysis of number and magnitude of CD4<sup>+</sup> and CD8<sup>+</sup> T-cell responses with anti-spike antibody titer (a), time since the last immunizing event in days (b), and age in years (c).

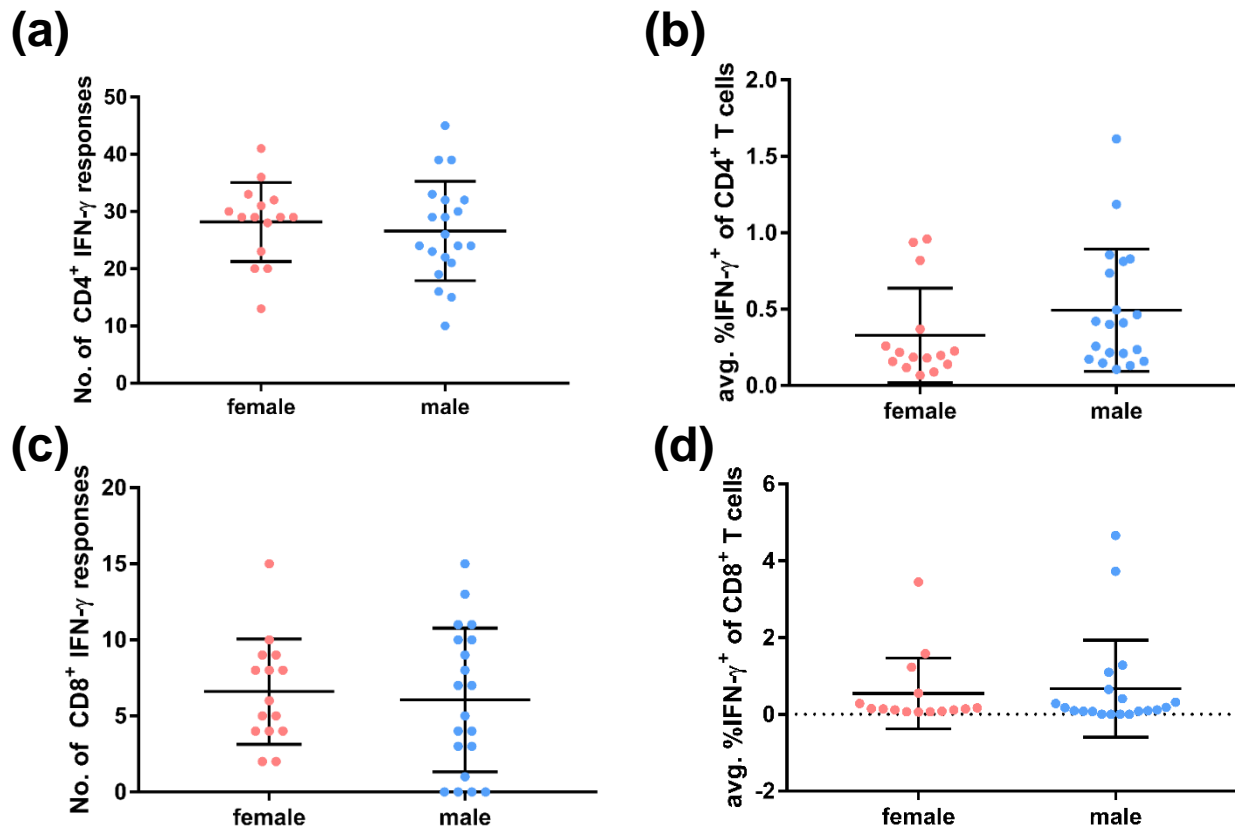

Supplementary Figure 5. Analysis of number and magnitude of CD4<sup>+</sup> and CD8<sup>+</sup> T-cell responses according to the sex at birth. There are no significant differences on the number and magnitude of CD4<sup>+</sup> T-cell responses (a-b) and CD8<sup>+</sup> T-cell responses (c-d) between individuals with female or male sex.

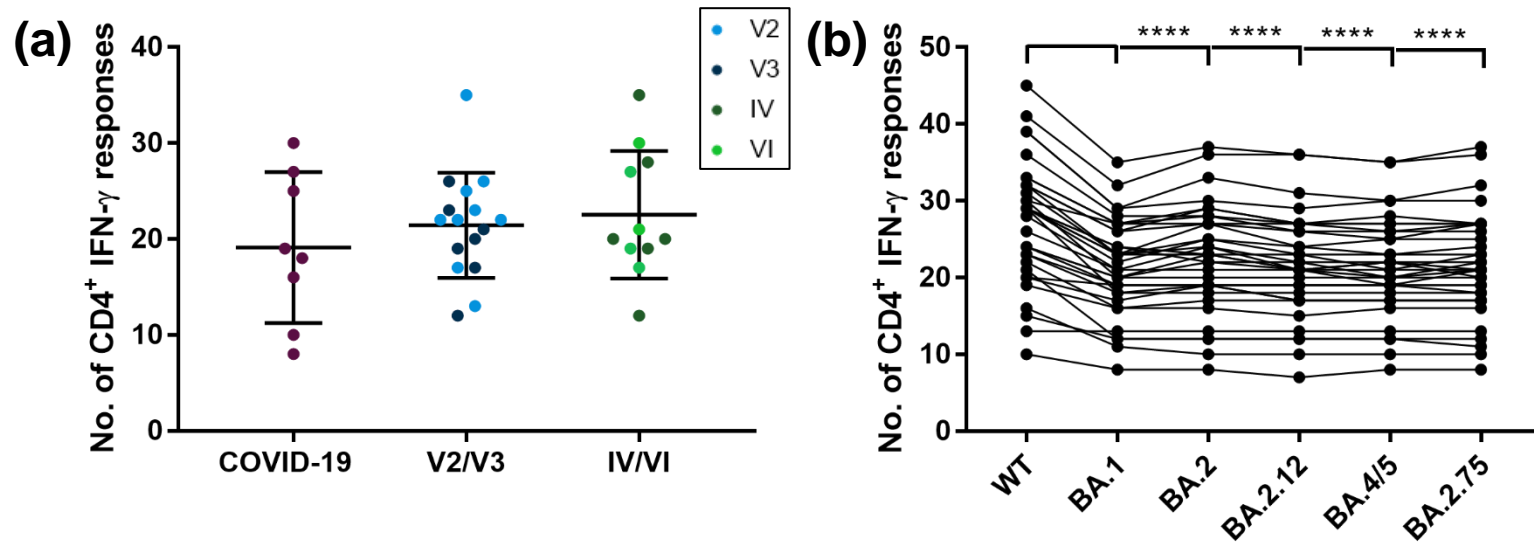

Supplementary Figure 6. The number of spike-specific CD4<sup>+</sup> T-cell responses with consideration of mutational changes in the Omicron VoCs and different ways of immunization. The number of CD4<sup>+</sup> T-cell responses for each study participant without peptides that contain mutational changes in the B.1.1.529.4/5 VoC (a). After the exclusion of peptides affected in different variants, the number of responses is significantly reduced compared to all peptides (b). Each group of connected dots represents one study participant. The displayed level of significance is calculated in comparison to the wild-type peptide sequence.

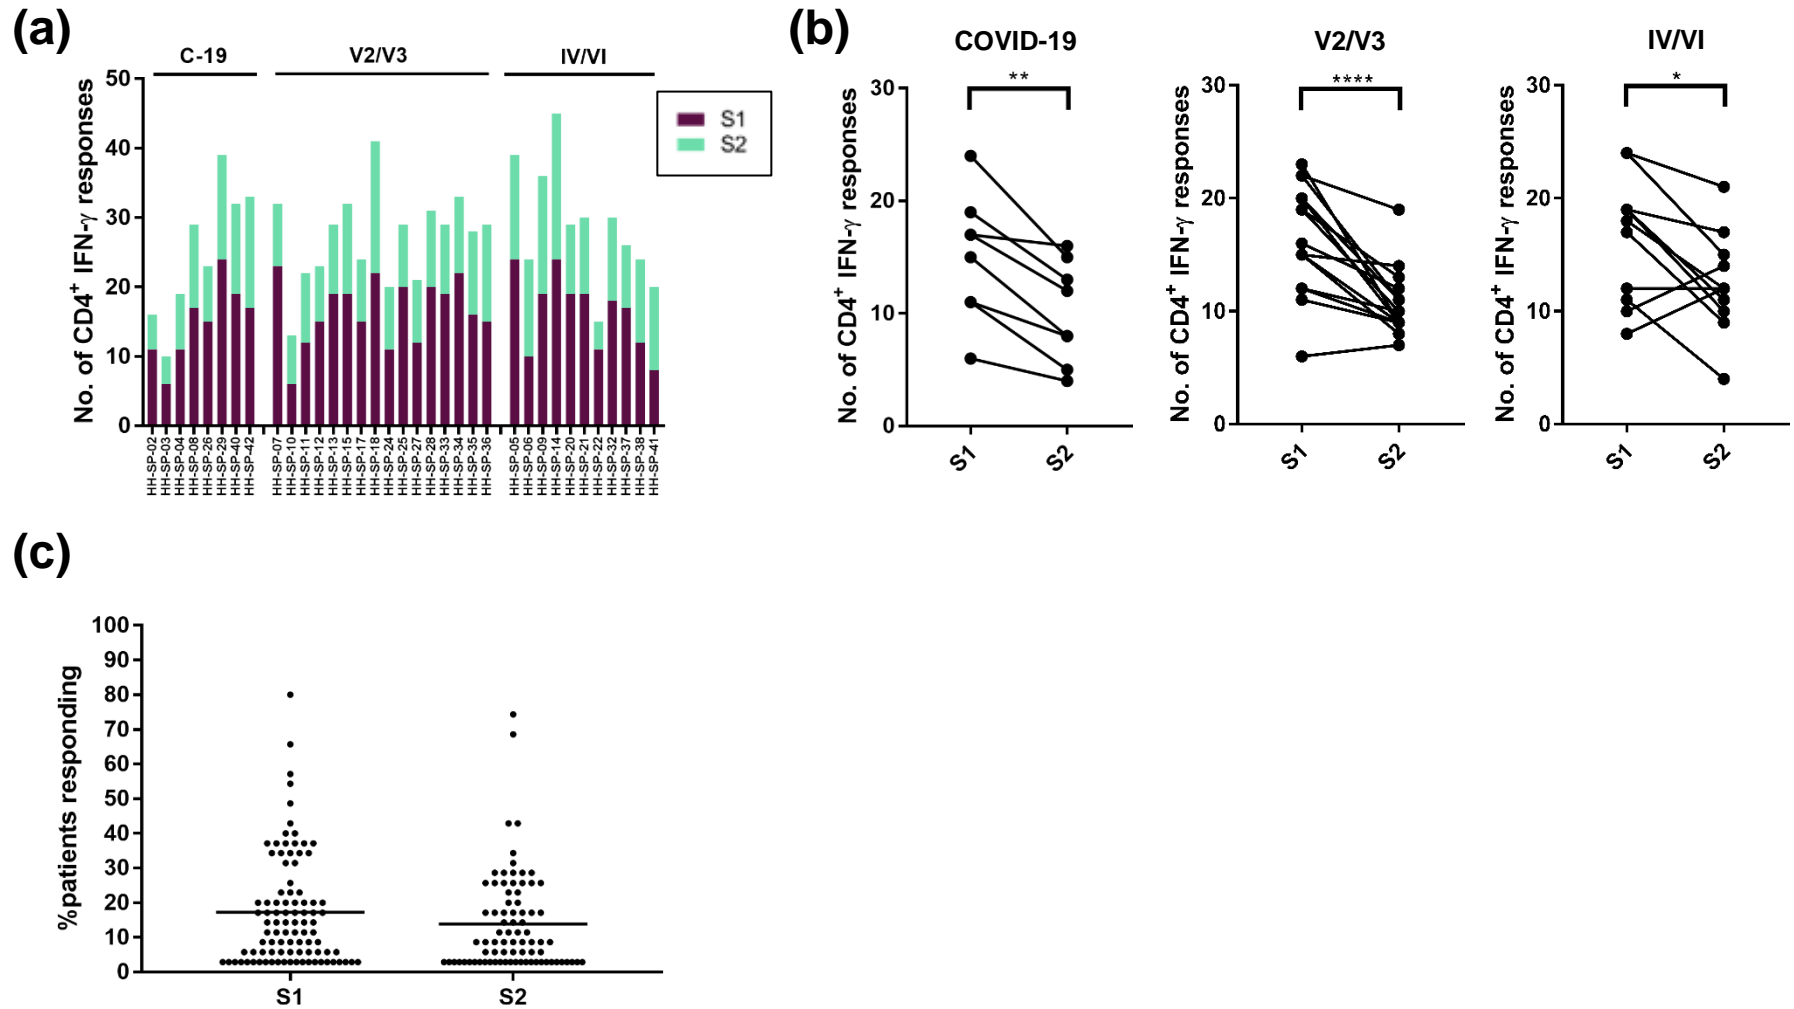

**Supplementary Figure 7. Response pattern in the S1 and S2 subunits.** Number of CD4<sup>+</sup> T-cell responses (S1 purple, S2 green). **(a)** The study participants recognized significantly lower numbers of peptides located in the S2 subunit compared to the S1 subunit **(b)**. This was still true when adjusting for the different lengths of the subunits. Peptides in the S1 subunit that elicited CD4<sup>+</sup> T-cell responses in our study were on average recognized by slightly more patients compared to recognized peptides from the S2 subunit **(c)**.



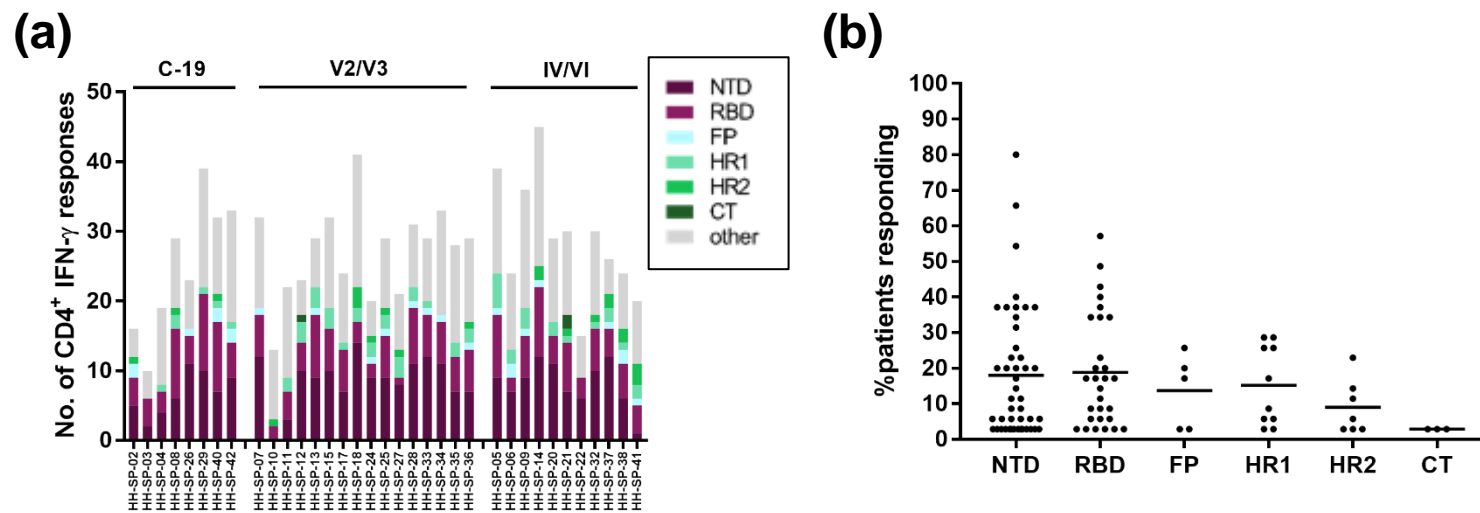

**Supplementary Figure 8. Response pattern in the functional domains.** Number of CD4<sup>+</sup> T-cell responses of each patient expressed as the relative share of responses to peptides of the different functional domains. **(a)**. Peptides in the RBD that elicited CD4<sup>+</sup> T-cell responses in our study were on average recognized by slightly more patients compared to recognized peptides from the other functional domains **(b)**.

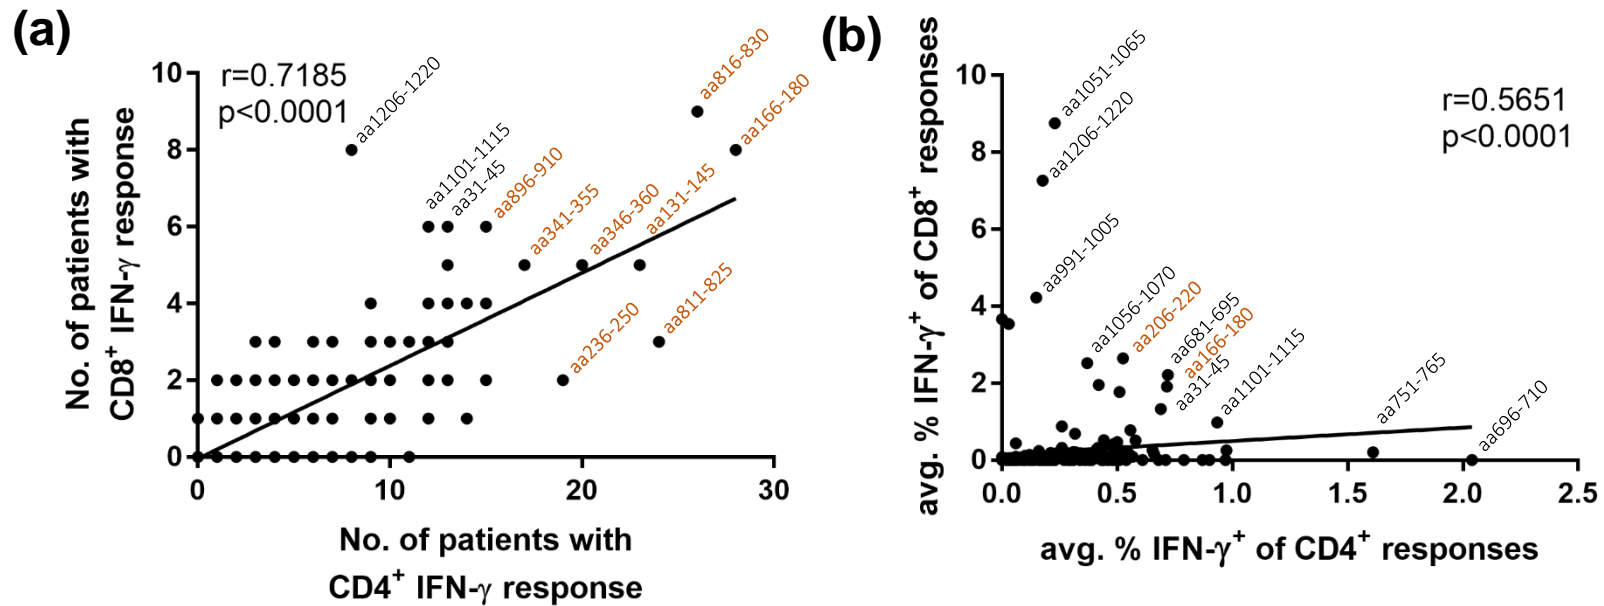

Supplementary Figure 9. Correlation analysis of number and magnitude of CD4<sup>+</sup> and CD8<sup>+</sup> T-cell responses towards each peptide.

The number **(a)** and average magnitude **(b)** of the CD4<sup>+</sup> and CD8<sup>+</sup> T-cell responses for each peptide correlate significantly. Each dot represents one of the 15-mer peptides. For peptides frequently recognized **(a)** or recognized with high average magnitudes **(b)** by CD4<sup>+</sup> and CD8<sup>+</sup> T-cells, the amino acids are given. Orange color indicates peptides included in the pool of most frequently detected peptides. For reference see Figure 3b.

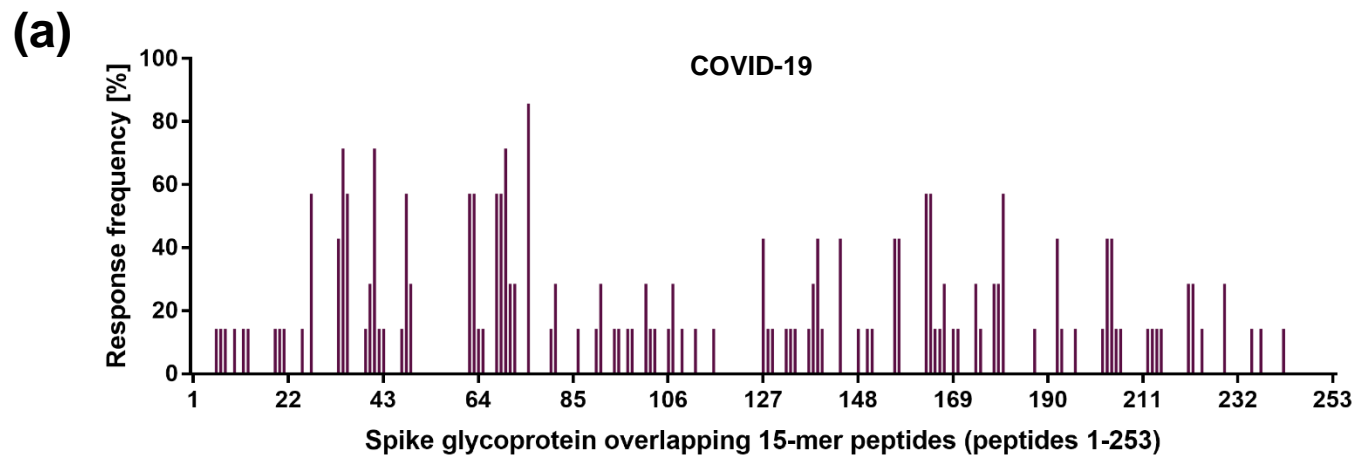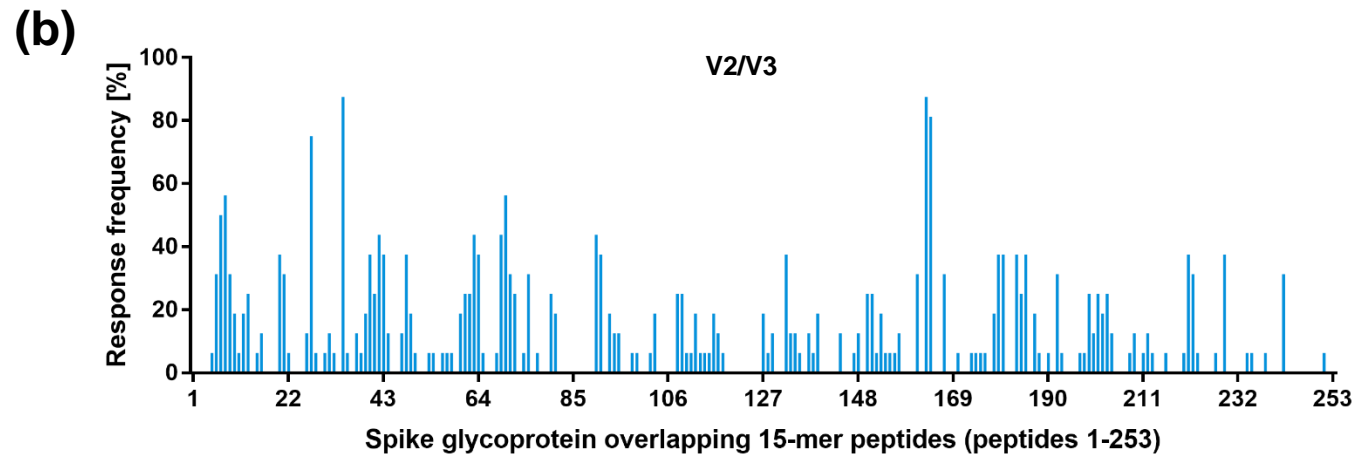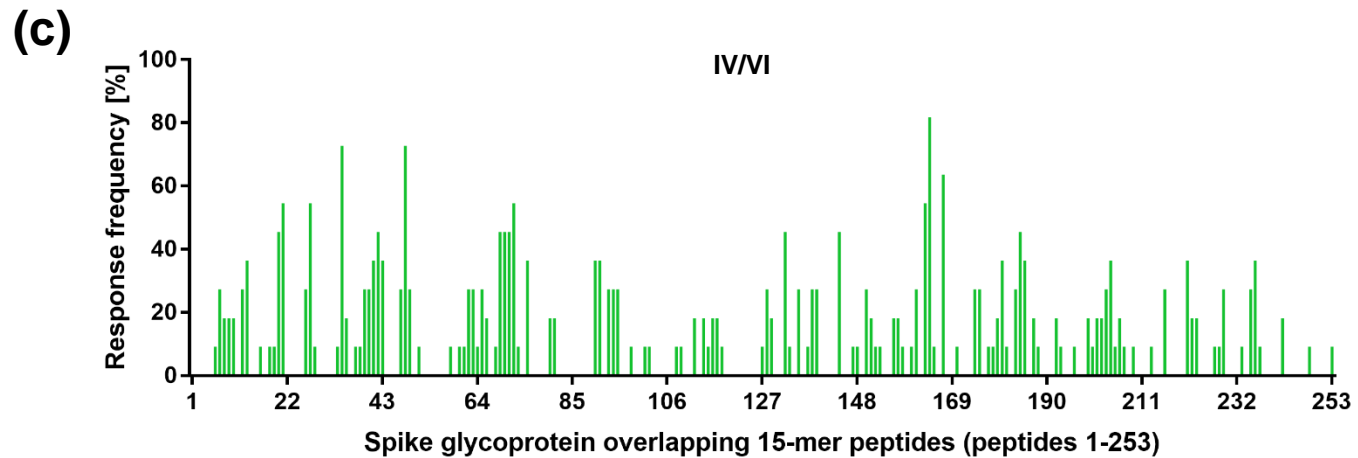

**Supplementary Figure 10. Response frequency to the individual spike 15-mer peptides subdivided by study groups. CD4<sup>+</sup> T-cell response frequencies of COVID-19 patients (a), vaccinated individuals (b), and individuals with both vaccination and infection (c) to every of the 253 overlapping 15-mer peptides covering the spike glycoprotein.**

| Most frequently detected peptides of the spike glycoprotein - COVID-19 |             |          |   |     |       |     |     |   |   |   |     |       |     |       |          |       |        |  |
|------------------------------------------------------------------------|-------------|----------|---|-----|-------|-----|-----|---|---|---|-----|-------|-----|-------|----------|-------|--------|--|
| peptide#                                                               | aa position | Sequence |   |     |       |     |     |   |   |   |     |       |     |       |          |       | RF     |  |
| 27                                                                     | 131-145     | C        | E | F   | Q     | F   | C   | N | D | P | F   | L     | G D | V Del | Y Del    | Y Del | 62.50% |  |
| 34                                                                     | 166-180     | C        | T | F   | E     | Y   | V   | S | Q | P | F   | L     | M   | D     | L        | E     | 75.00% |  |
| 35                                                                     | 171-185     | V        | S | Q   | P     | F   | L   | M | D | L | E   | G     | K   | Q     | G        | N     | 50.00% |  |
| 41                                                                     | 201-215     | F        | K | I   | Y     | S   | K   | H | T | P | I V | N Del | L I | V G   | R insEPE | D     | 62.50% |  |
| 48                                                                     | 236-250     | T        | R | F   | Q     | T   | L   | L | A | L | H   | R     | S   | Y     | L        | T     | 62.50% |  |
| 62                                                                     | 306-320     | F        | T | V   | E     | K   | G   | I | Y | Q | T   | S     | N   | F     | R        | V     | 50.00% |  |
| 63                                                                     | 311-325     | G        | I | Y   | Q     | T   | S   | N | F | R | V   | Q     | P   | T     | E        | S     | 50.00% |  |
| 68                                                                     | 336-350     | C        | P | F   | G D/H | E   | V   | F | N | A | T   | R     | F   | A     | S        | V     | 50.00% |  |
| 69                                                                     | 341-355     | V        | F | N   | A     | T   | R   | F | A | S | V   | Y     | A   | W     | N        | R     | 62.50% |  |
| 70                                                                     | 346-360     | R        | F | A   | S     | V   | Y   | A | W | N | R   | K     | R   | I     | S        | N     | 75.00% |  |
| 75                                                                     | 371-385     | S L/F    | A | S P | F     | S F | T A | F | K | C | Y   | G     | V   | S     | P        | T     | 75.00% |  |
| 163                                                                    | 811-825     | K        | P | S   | K     | R   | S   | F | I | E | D   | L     | L   | F     | N        | K     | 50.00% |  |
| 164                                                                    | 816-830     | S        | F | I   | E     | D   | L   | L | F | N | K   | V     | T   | L     | A        | D     | 50.00% |  |
| 180                                                                    | 896-910     | I        | P | F   | A     | M   | Q   | M | A | Y | R   | F     | N   | G     | I        | G     | 62.50% |  |

| Most frequently detected peptides of the spike glycoprotein - V2/V3 |             |          |   |   |   |     |       |       |     |          |   |   |     |       |       |       |        |  |
|---------------------------------------------------------------------|-------------|----------|---|---|---|-----|-------|-------|-----|----------|---|---|-----|-------|-------|-------|--------|--|
| peptide#                                                            | aa position | Sequence |   |   |   |     |       |       |     |          |   |   |     |       |       |       | RF     |  |
| 7                                                                   | 31-45       | S        | F | T | R | G   | V     | Y     | Y   | P        | D | K | V   | F     | R     | S     | 50.00% |  |
| 8                                                                   | 36-50       | V        | Y | Y | P | D   | K     | V     | F   | R        | S | S | V   | L     | H     | S     | 56.25% |  |
| 27                                                                  | 131-145     | C        | E | F | Q | F   | C     | N     | D   | P        | F | L | G D | V Del | Y Del | Y Del | 75.00% |  |
| 34                                                                  | 166-180     | C        | T | F | E | Y   | V     | S     | Q   | P        | F | L | M   | D     | L     | E     | 87.50% |  |
| 42                                                                  | 206-220     | K        | H | T | P | I V | N Del | L I   | V G | R insEPE | D | L | P   | Q     | G     | F     | 43.75% |  |
| 63                                                                  | 311-325     | G        | I | Y | Q | T   | S     | N     | F   | R        | V | Q | P   | T     | E     | S     | 43.75% |  |
| 69                                                                  | 341-355     | V        | F | N | A | T   | R     | F     | A   | S        | V | Y | A   | W     | N     | R     | 43.75% |  |
| 70                                                                  | 346-360     | R        | F | A | S | V   | Y     | A     | W   | N        | R | K | R   | I     | S     | N     | 56.25% |  |
| 90                                                                  | 446-460     | G S      | G | N | Y | N   | Y     | L Q/R | Y   | R        | L | F | R   | K     | S     | N / K | 43.75% |  |
| 163                                                                 | 811-825     | K        | P | S | K | R   | S     | F     | I   | E        | D | L | L   | F     | N     | K     | 87.50% |  |
| 164                                                                 | 816-830     | S        | F | I | E | D   | L     | L     | F   | N        | K | V | T   | L     | A     | D     | 81.25% |  |

| Most frequently detected peptides of the spike glycoprotein - IV/VI |             |          |   |   |   |     |       |     |     |          |   |   |     |       |       |       |        |  |
|---------------------------------------------------------------------|-------------|----------|---|---|---|-----|-------|-----|-----|----------|---|---|-----|-------|-------|-------|--------|--|
| peptide#                                                            | aa position | Sequence |   |   |   |     |       |     |     |          |   |   |     |       |       |       | RF     |  |
| 20                                                                  | 96-110      | E        | K | S | N | I   | I     | R   | G   | W        | I | F | G   | T     | T     | L     | 45.45% |  |
| 21                                                                  | 101-115     | I        | R | G | W | I   | F     | G   | T   | T        | L | D | S   | K     | T     | Q     | 54.55% |  |
| 27                                                                  | 131-145     | C        | E | F | Q | F   | C     | N   | D   | P        | F | L | G D | V Del | Y Del | Y Del | 54.55% |  |
| 34                                                                  | 166-180     | C        | T | F | E | Y   | V     | S   | Q   | P        | F | L | M   | D     | L     | E     | 72.72% |  |
| 42                                                                  | 206-220     | K        | H | T | P | I V | N Del | L I | V G | R insEPE | D | L | P   | Q     | G     | F     | 45.45% |  |
| 48                                                                  | 236-250     | T        | R | F | Q | T   | L     | L   | A   | L        | H | R | S   | Y     | L     | T     | 72.72% |  |
| 69                                                                  | 341-355     | V        | F | N | A | T   | R     | F   | A   | S        | V | Y | A   | W     | N     | R     | 45.45% |  |
| 70                                                                  | 346-360     | R        | F | A | S | V   | Y     | A   | W   | N        | R | K | R   | I     | S     | N     | 45.45% |  |
| 71                                                                  | 351-365     | Y        | A | W | N | R   | K     | R   | I   | S        | N | C | V   | A     | D     | Y     | 45.45% |  |
| 72                                                                  | 356-370     | K        | R | I | S | N   | C     | V   | A   | D        | Y | S | V   | L     | Y     | N     | 54.55% |  |
| 132                                                                 | 656-670     | V        | N | N | S | Y   | E     | C   | D   | I        | P | I | G   | A     | G     | I     | 45.45% |  |
| 144                                                                 | 716-730     | T        | N | F | T | I   | S     | V   | T   | T        | E | I | L   | P     | V     | S     | 45.45% |  |
| 163                                                                 | 811-825     | K        | P | S | K | R   | S     | F   | I   | E        | D | L | L   | F     | N     | K     | 54.55% |  |
| 164                                                                 | 816-830     | S        | F | I | E | D   | L     | L   | F   | N        | K | V | T   | L     | A     | D     | 81.82% |  |
| 167                                                                 | 831-845     | A        | G | F | I | K   | Q     | Y   | G   | D        | C | L | G   | D     | I     | A     | 63.64% |  |
| 184                                                                 | 916-930     | L        | Y | E | N | Q   | K     | L   | I   | A        | N | Q | F   | N     | S     | A     | 45.45% |  |

**Supplementary Figure 11. Identification of the most frequently detected peptides by CD4<sup>+</sup>T cells subdivided by study groups.** Peptide numbers, corresponding amino acid positions and sequences as well as response frequencies of the most frequently detected peptides. Mutations in the variants of concern (VoC) are highlighted: Mutations found only in BA.1 are in blue, mutations found in BA.1, BA.2, BA.2.12, BA.4/5 and BA.2.75 are in red, mutations found in BA.2, BA.2.12, BA.4/5 and BA.2.75 are in green. Mutations found in BA.1, BA.2, BA.2.12 and BA.4/5 are in light blue. Mutations only found in BA.2.12 are in orange and mutations only found in BA.4/5 are in violet. Mutations found in BA.1 and BA.2.75 are in grey, mutations only found in BA.2.75 are in pink.

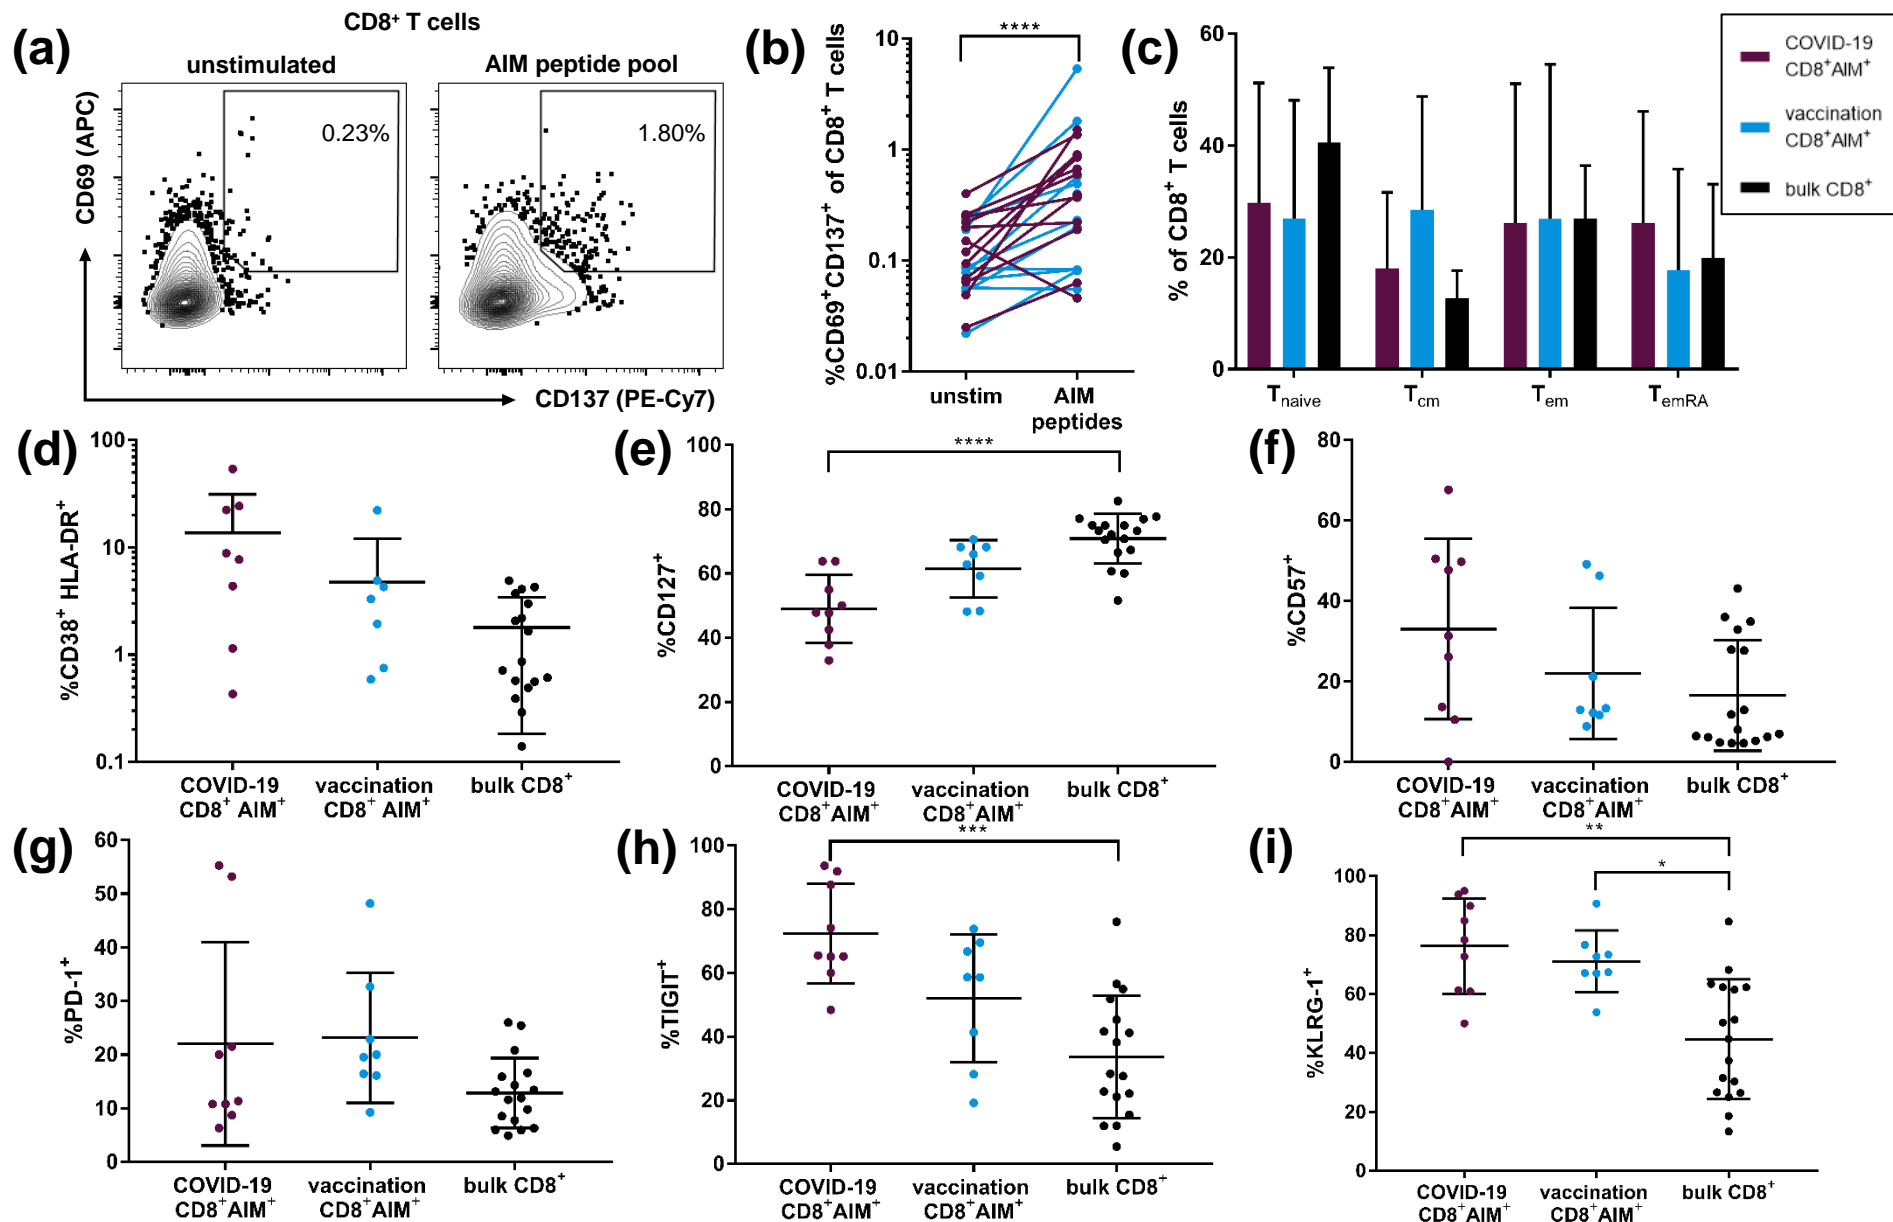

Supplementary Figure 12. Frequencies and phenotype of AIM<sup>+</sup> CD8<sup>+</sup> T cells in response to a spike glycoprotein peptide pool. Thawed PBMC were stimulated for 18h with a peptide pool or SEB (positive control) or were left untreated (negative control) and analyzed by flow cytometry. Antigen-reactive CD8<sup>+</sup> T cells were defined as CD69<sup>+</sup>CD137<sup>+</sup> (a). After stimulation with the peptide pool, an increase in AIM<sup>+</sup> (CD69<sup>+</sup>CD137<sup>+</sup>) CD8<sup>+</sup> T cells could be observed in most individuals except for a few non-responders (b). Non-responders were excluded from further analyses. Memory phenotype of AIM<sup>+</sup> CD8<sup>+</sup> T cells of individuals with COVID-19 or vaccination in comparison to bulk CD8<sup>+</sup> T cells (c). AIM<sup>+</sup> CD8<sup>+</sup> T cells of individuals with COVID-19 and vaccinated individuals were compared to bulk CD8<sup>+</sup> T cells with regard to their expression of activation markers CD38 and HLA-DR (d), CD127 (e), CD57 (f), PD-1 (g), TIGIT (h) and KLRG-1 (i).

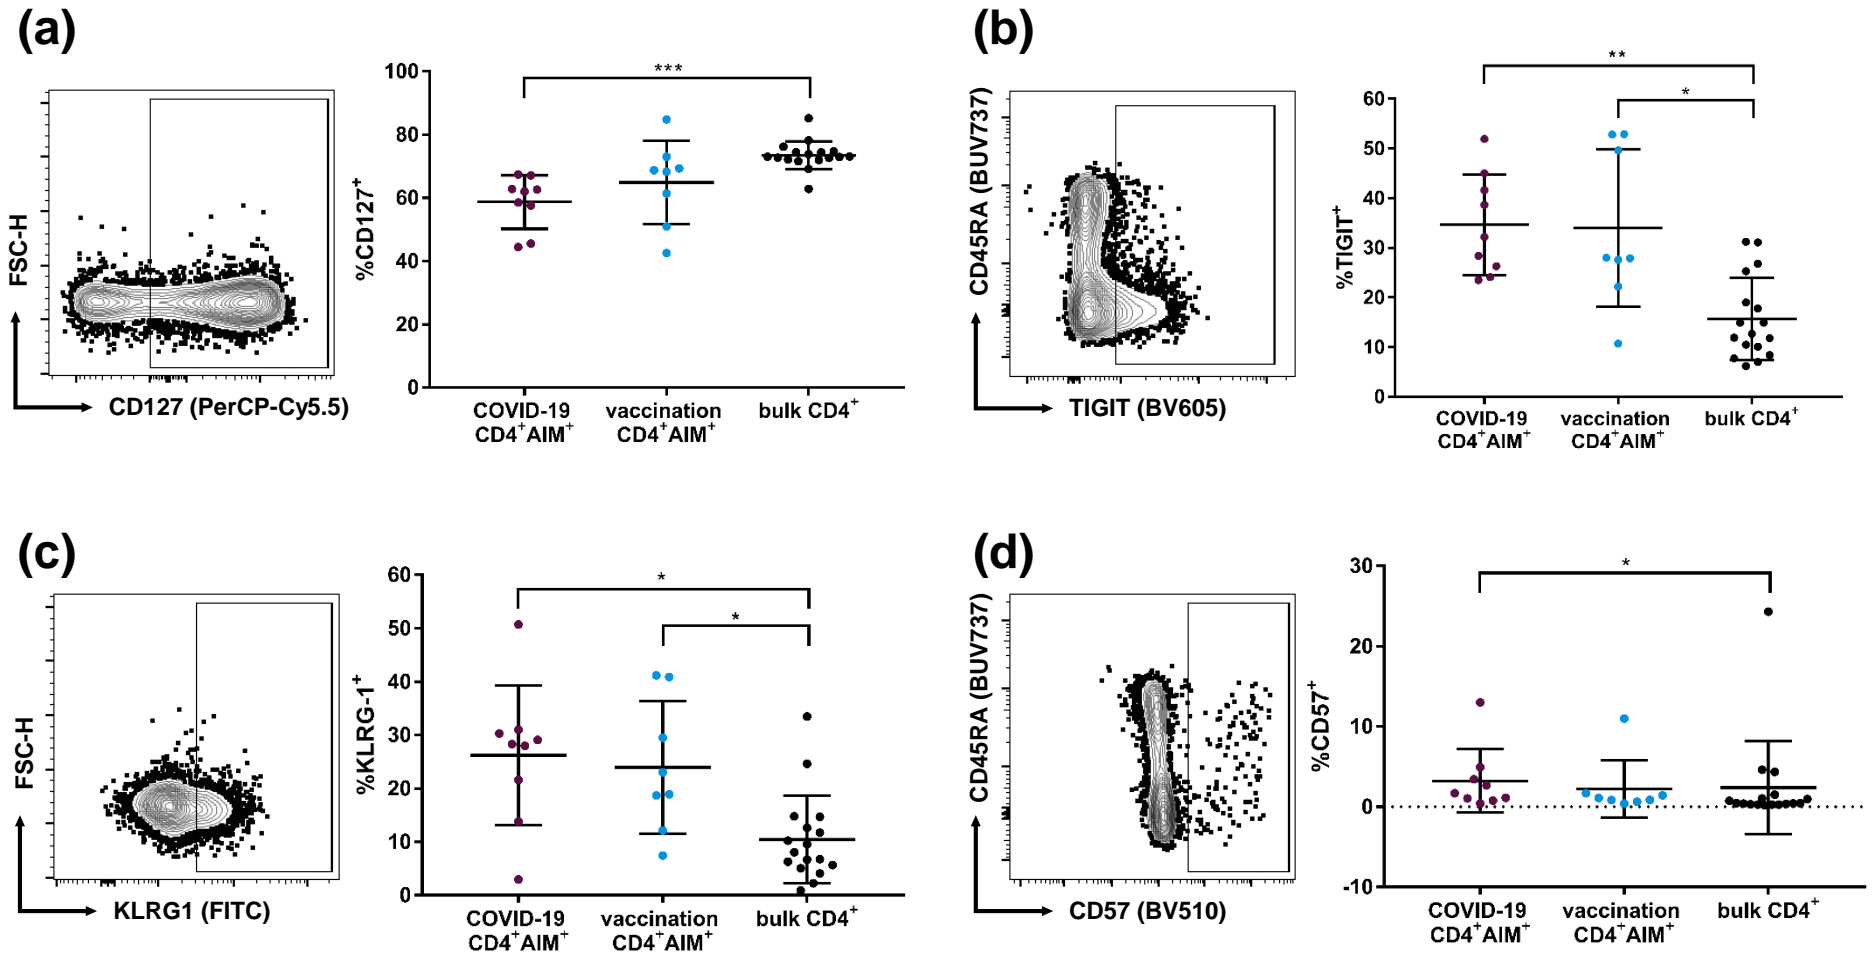

Supplementary Figure 13. Phenotype of AIM<sup>+</sup> CD4<sup>+</sup> T cells in response to a spike glycoprotein peptide pool. AIM<sup>+</sup> CD4<sup>+</sup> T cells of individuals with COVID-19 show significantly reduced expression of CD127 (a) and significantly higher proportions of TIGIT<sup>+</sup> (b) and KLRG1<sup>+</sup> (c) frequencies compared to bulk CD4<sup>+</sup> T cells. CD57 expression is not significantly different between AIM<sup>+</sup> and bulk CD4<sup>+</sup> T cells (d).

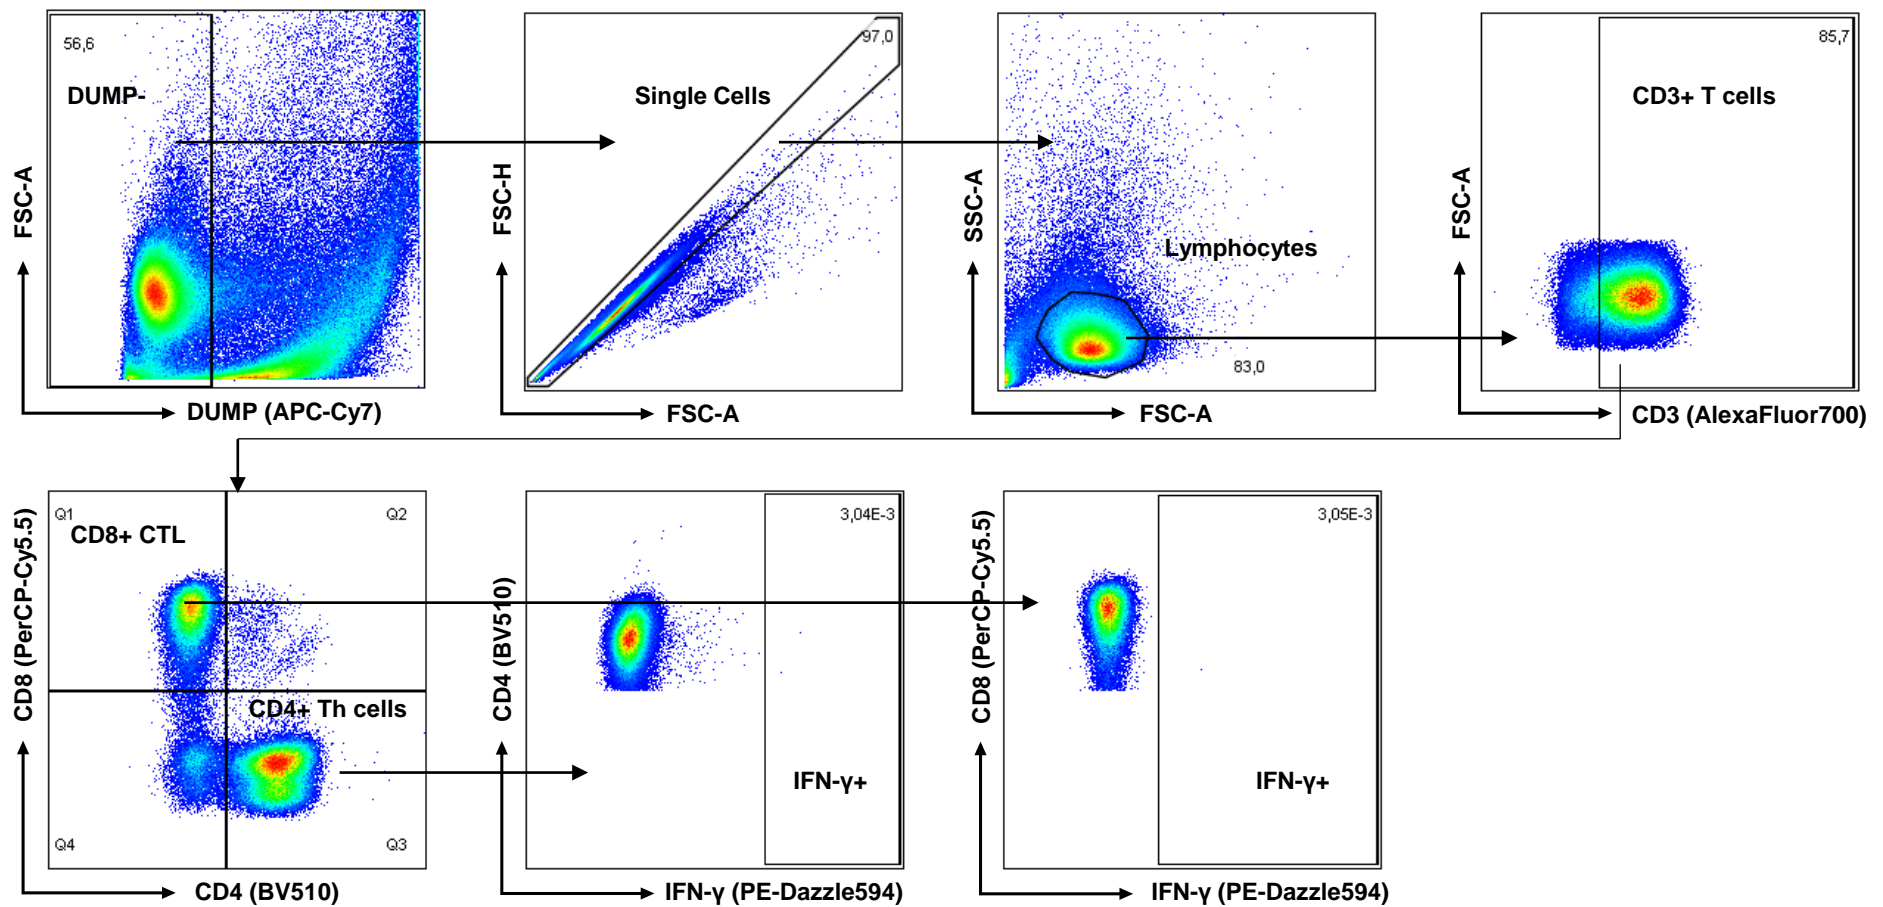

**Supplementary Figure 14. Gating strategy for identification of IFN- $\gamma$  producing CD4<sup>+</sup> and CD8<sup>+</sup> T cells.** First, dead cells, CD14<sup>+</sup> and CD19<sup>+</sup> cells (DUMP) as well as doublets were excluded. CD4<sup>+</sup> T helper cells were identified as CD3<sup>+</sup> CD4<sup>+</sup> CD8<sup>-</sup> Lymphocytes and CD8<sup>+</sup> cytotoxic T cells were identified as CD3<sup>+</sup> CD4<sup>-</sup> CD8<sup>+</sup> Lymphocytes. Both Subsets were analyzed for IFN- $\gamma$  expression.
